# Supplementary figures and images for: Intracellular Angiotensin II Production in Diabetic Rats Is Correlated With Cardiomyocyte Apoptosis, Oxidative Stress, and Cardiac Fibrosis
Source: PubMed Central journal article supplement — Diabetes. 2008 Dec;57(12):3297–306. doi: 10.2337/db08-0805 (PMC2584136; doi:10.2337/db08-0805), 2008-12

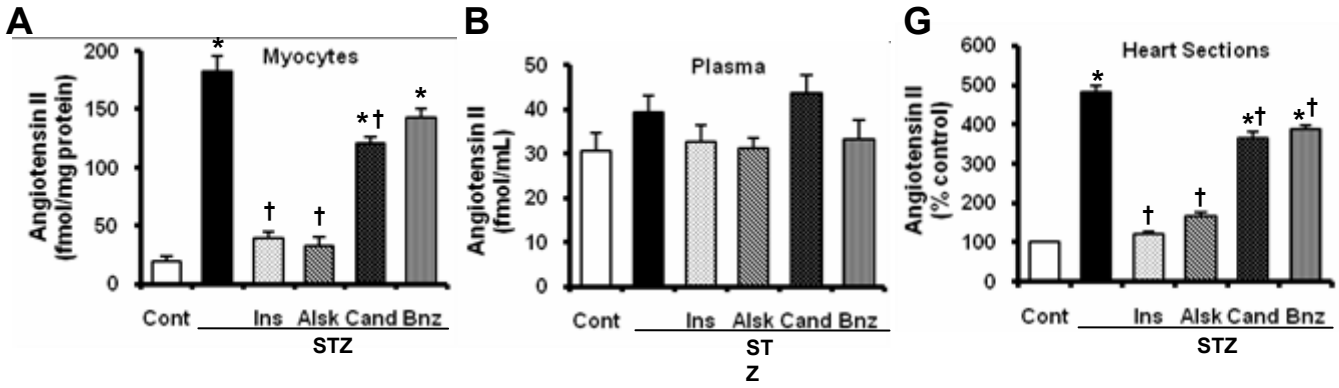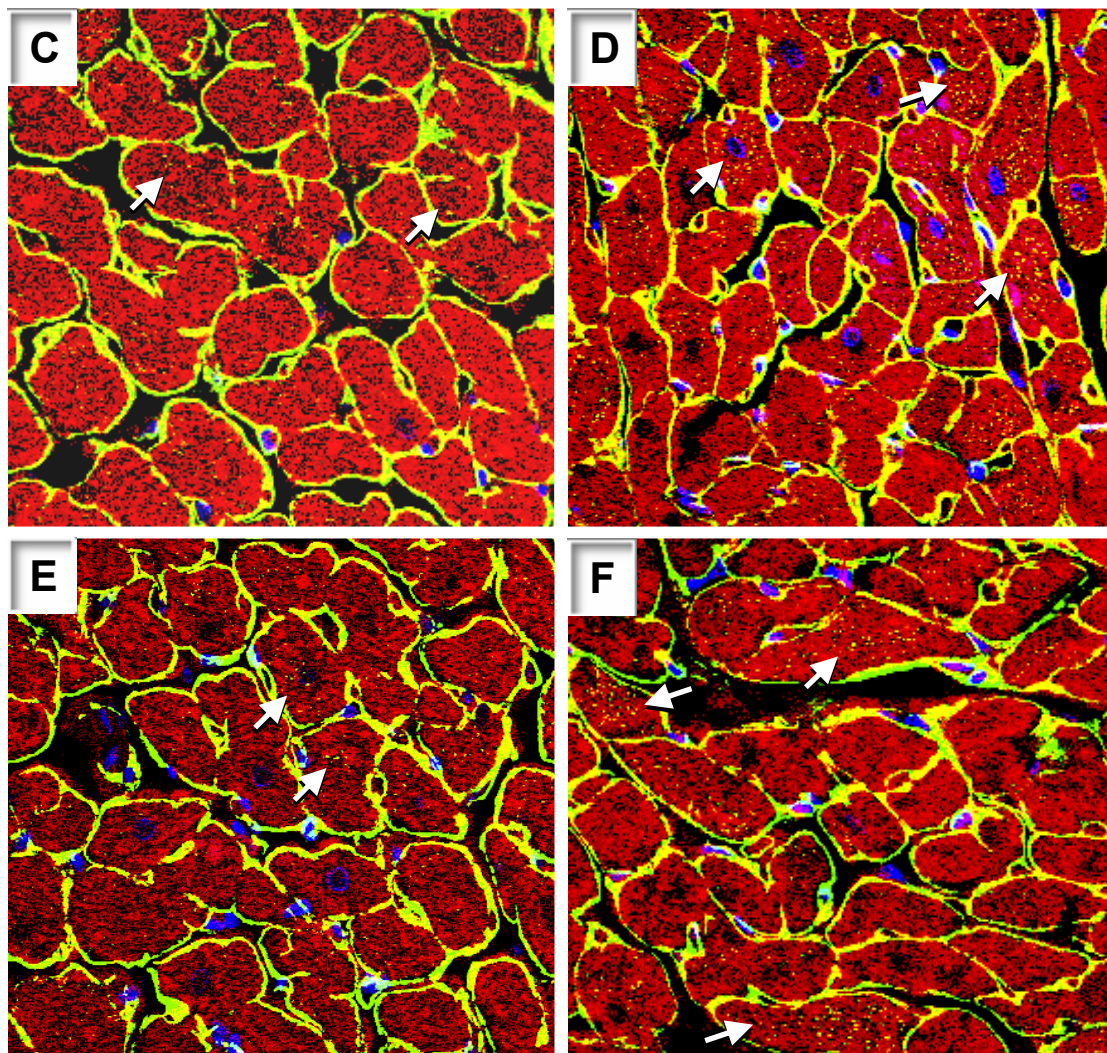

Fig. 1

Supplement: db08-0805_1.pdf [file db08-0805_1.pdf]
